# Supplementary figures and images for: An upstream interacting context based framework for the computational inference of microRNA functions
Source: Royal Society of Chemistry journal article supplement (doi:10.1039/c2mb05469h), 2012-02-23

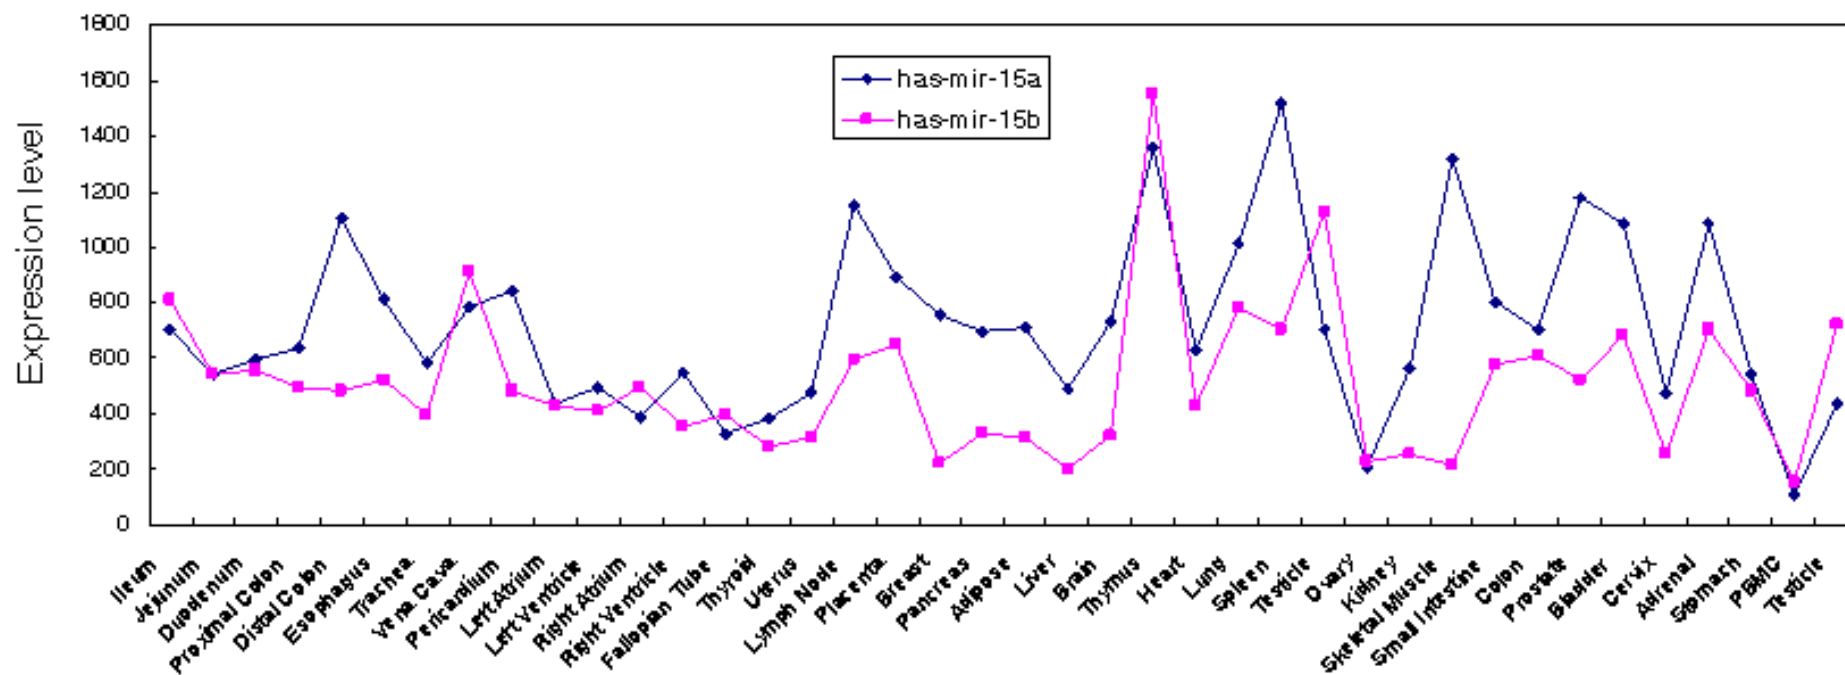

Fig. S1 Comparison of expression profiles of hsa-mir-15a and hsa-mir-15b.

Supplement: c2mb05469h.pdf [file c2mb05469h.pdf]
